# Supplementary material for: Envisioning Transformation in VA Mental Health Services Through Collaborative Site Visits
Source: Atypon-hosted journal article supplement (doi:10.1176/appi.ps.201700534), 2018-04-16
Supplement: appi.ps.201700534.ds001.pdf [file appi.ps.201700534.ds001.pdf]

## Partnerships in site visit development

| Partners                                               | Key Contribution(s)                                                                                                                                                                                                                                                                                                                                                                                                                                                                                                                                                                                                                                                                                                                                                                                                                                                                                                                                                                                                               |
|--------------------------------------------------------|-----------------------------------------------------------------------------------------------------------------------------------------------------------------------------------------------------------------------------------------------------------------------------------------------------------------------------------------------------------------------------------------------------------------------------------------------------------------------------------------------------------------------------------------------------------------------------------------------------------------------------------------------------------------------------------------------------------------------------------------------------------------------------------------------------------------------------------------------------------------------------------------------------------------------------------------------------------------------------------------------------------------------------------|
| Technical Assistance Team in Mental Health Operations  | <ul style="list-style-type: none"> <li>• Developed initial site visit protocol with interview questions addressing UMHSH core areas</li> <li>• Prior to site visit, TAs reviewed administrative data and developed specific questions to add to standardized protocol tailored to each facility</li> <li>• Trained site visitors in collaboration with PEC team</li> <li>• Coordinated all aspects of the site visits with regional and local facility partners</li> <li>• Coordinated and led site visit teams</li> <li>• Authored site visit reports and assisted with follow-up calls with facilities</li> <li>• Assisted facilities with development of action plans addressing site visit recommendations</li> <li>• Reviewed and provided feedback on quarterly action plans from facilities</li> <li>• Assisted PEC team with identification of qualitative data analysis of reports</li> <li>• Provided ongoing refinement of site visit and action planning protocols based on stakeholder feedback and input</li> </ul> |
| Program Evaluation Centers in Mental Health Operations | <ul style="list-style-type: none"> <li>• Created metrics for assessing UMHSH</li> <li>• Provided administrative data review prior to site visits</li> <li>• Assisted in site visit process development for improved data collection</li> <li>• Developed a customizable, interactive Excel workbook to capture site visit data</li> <li>• Trained site visitors in collaboration with TAs</li> <li>• Reviewed action plans for measurable targets</li> <li>• Implemented qualitative data analysis of all site visit reports and exit summaries</li> </ul>                                                                                                                                                                                                                                                                                                                                                                                                                                                                        |
| Mental Health Policy                                   | <ul style="list-style-type: none"> <li>• Provided initial protocol review to ensure key policies were reviewed</li> <li>• Provided review of revised protocols for new policies</li> <li>• Reviewed site visit reports</li> <li>• Served as site visitors and consultants</li> </ul>                                                                                                                                                                                                                                                                                                                                                                                                                                                                                                                                                                                                                                                                                                                                              |
| Regional Mental Health Leads                           | <ul style="list-style-type: none"> <li>• Reviewed protocol to provide feedback for improvement</li> <li>• Attended site visits for their assigned facilities when possible</li> <li>• Reviewed site visit report draft</li> <li>• Partnered in action plan development and monitoring</li> <li>• Participated in site visit follow-up phone calls</li> <li>• Provided site visitors and consultants</li> </ul>                                                                                                                                                                                                                                                                                                                                                                                                                                                                                                                                                                                                                    |

|                             |                                                                                                                                                                                                                                                                                                    |
|-----------------------------|----------------------------------------------------------------------------------------------------------------------------------------------------------------------------------------------------------------------------------------------------------------------------------------------------|
|                             | <ul style="list-style-type: none"><li>• Provided feedback on site visit and action planning process</li></ul>                                                                                                                                                                                      |
| Field Mental Health Experts | <ul style="list-style-type: none"><li>• Served as site visitors with field-based experience in implementation</li><li>• Provided protocol reviews and process revisions for improvement in data gathering</li><li>• Provided feedback from visited sites on site visit protocol revision</li></ul> |
| Research Partners           | <ul style="list-style-type: none"><li>• Provided initial protocol review</li><li>• Participated as pilot site visitors and provided feedback for process improvement</li></ul>                                                                                                                     |

---
